# Supplementary material for: Scutellarein-containing novel formula attenuates hypoxia through inhibiting apoptosis
Source: Research Square preprint supplement (doi:10.21203/rs.3.rs-7839138/v1), 2025-10-14
Supplement: Supplementary file 1 [file 7cb30c5a4ce40d18287e1547.docx]

**Table1** LC-MS/MS Identification of Prototype Blood Bioactive Components in Serum from GY2H-Treated Mice

| **Metabolite** | **m/z** | **Retention time** | **Fragmentation Score** | **Peak area** | **Category** | **Formula** |
| --- | --- | --- | --- | --- | --- | --- |
| **(+)-Neo-olivil** | 375.15 | 4.83 | 45.5 | 31927.29 | Others |  |
| **1,7-Dihydroxy-3,5-dimethoxyxanthone** | 287.06 | 4.76 | 37.7 | 98994.63 | Lipids | 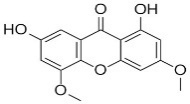 |
| **2-Linoleoyl Glycerol** | 355.28 | 13.52 | 83.4 | 4973.15 | Flavonoids | 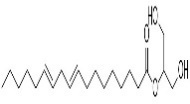 |
| **6-Hydroxykaempferol** | 301.04 | 7.09 | 81.1 | 204500.47 | Terpenoids | 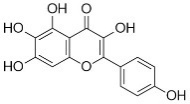 |
| **alpha-Boswellic acid** | 455.35 | 14.82 | 35.7 | 43442.38 | Flavonoids | 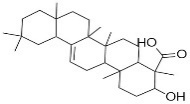 |
| **Apigenin** | 251.03 | 9.07 | 74.8 | 32732.45 | Steroids and steroid derivatives | 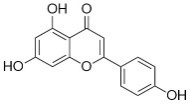 |
| **Beta-sitostenone** | 413.38 | 14.19 | 61.6 | 47.49 | Flavonoids | 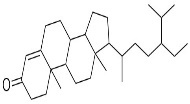 |
| **Calycosin-7-O-beta-D-glucoside** | 447.13 | 4.21 | 98.6 | 1025926.04 | Phenolic acids and derivatives | 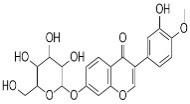 |
| **Diethyl Phthalate** | 221.08 | 7.07 | 71.8 | 14846.90 | Flavonoids | 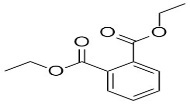 |
| **Diosmetin** | 299.06 | 7.18 | 94.1 | 47621.57 | Flavonoids | 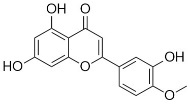 |
| **Fisetin** | 287.0 | 7.10 | 95.7 | 197515.43 | Terpenoids | 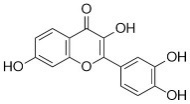 |
| **gamma-Calacorene** | 201.16 | 13.58 | 88 | 4232.95 | Terpenoids | 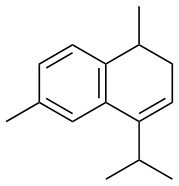 |
| **Gypsogenin** | 471.35 | 11.86 | 82.10 | 8556.62 | Others | 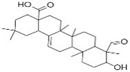 |
| **Mollugin** | 283.10 | 9.72 | 45.50 | 6680.42 | - | 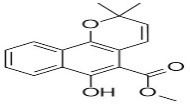 |
| **Negsehisandrin G** | 485.25 | 13.74 | 74.70 | 1167101.08 | Flavonoids | 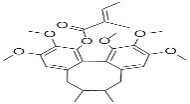 |
| **Nobiletin** | 403.14 | 10.14 | 97.20 | 13249.38 | Terpenoids | 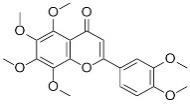 |
| **Oleanolic Acid** | 455.35 | 15.40 | 87.70 | 26205.22 | Organic acids and derivatives | 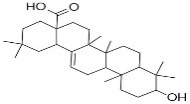 |
| **Oxalacetic acid** | 131.00 | 0.99 | 86.40 | 6392.73 | Steroids and steroid derivatives | 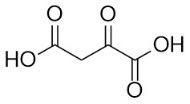 |
| **Progesterone** | 315.23 | 10.28 | 76.70 | 9962.07 | Quinones | 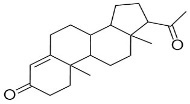 |
| **Purpurin** | 315.05 | 4.74 | 54.00 | 2025.26 | Tannins | 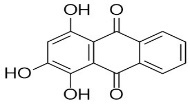 |
| **Schisandrin B** | 401.20 | 13.69 | 88.70 | 7314167.94 | Flavonoids | 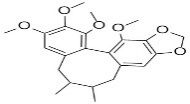 |
| **Scutellarein** | 285.04 | 7.09 | 65.60 | 2581705.66 | Alkaloids and derivatives | 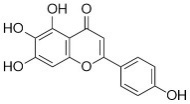 |
| **Yibeissine** | 444.31 | 12.52 | 45.50 | 20286.45 | Others | 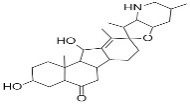 |
